# Supplementary material for: Novel Portable Sensing System with Integrated Multifunctionality for Accurate Detection of Salivary Uric Acid
Source: MDPI journal article supplement (doi:10.3390/bios11070242), 2021-07-16
Supplement: s1 [file s1]

# Novel Portable Sensing System with Integrated Multifunctionality for Accurate Detection of Salivary Uric Acid

Ziqi Liu <sup>1,†</sup>, Yiyin Chen <sup>2,†</sup>, Meng Zhang <sup>3</sup>, Tiancheng Sun <sup>1</sup>, Keer Li <sup>1</sup>, Songjia Han <sup>1</sup> and Hui-Juan Chen <sup>1,\*</sup>

<sup>1</sup> State Key Laboratory of Optoelectronic Materials and Technologies, School of Electronics and Information Technology, Sun Yat-sen University, Guangzhou 510006, China; liuzq28@mail2.sysu.edu.cn (Z.L.); suntch@mail2.sysu.edu.cn (T.S.); liker@mail2.sysu.edu.cn (K.L.); hansongjia@126.com (S.H.)

<sup>2</sup> West China School of Stomatology, Sichuan University, Chengdu 610041, China; hxkqchenyiyin@163.com

<sup>3</sup> Precision Medicine Institute, The First Affiliated Hospital of Sun Yat-Sen University, Sun Yat-Sen University, Guangzhou 510080, China; meng.zhang\_china@outlook.com

\* Correspondence: chenhuix5@mail.sysu.edu.cn

† The two authors contributed equally to this paper

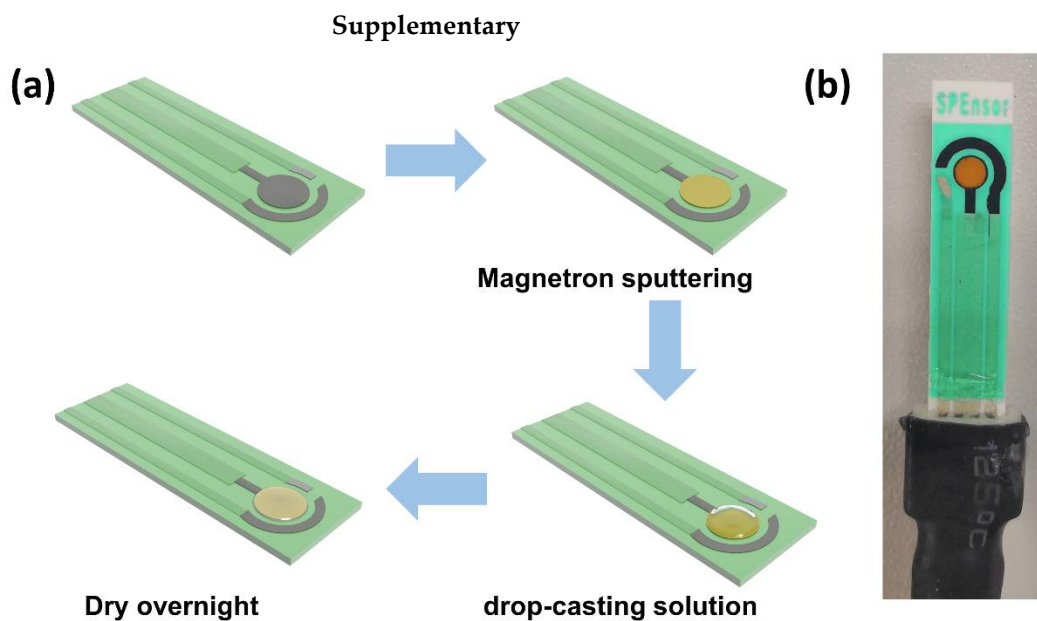

**Figure S1.** (a) Schematic diagram of the production process of the UAS. (b) Detail photograph of the UAS.

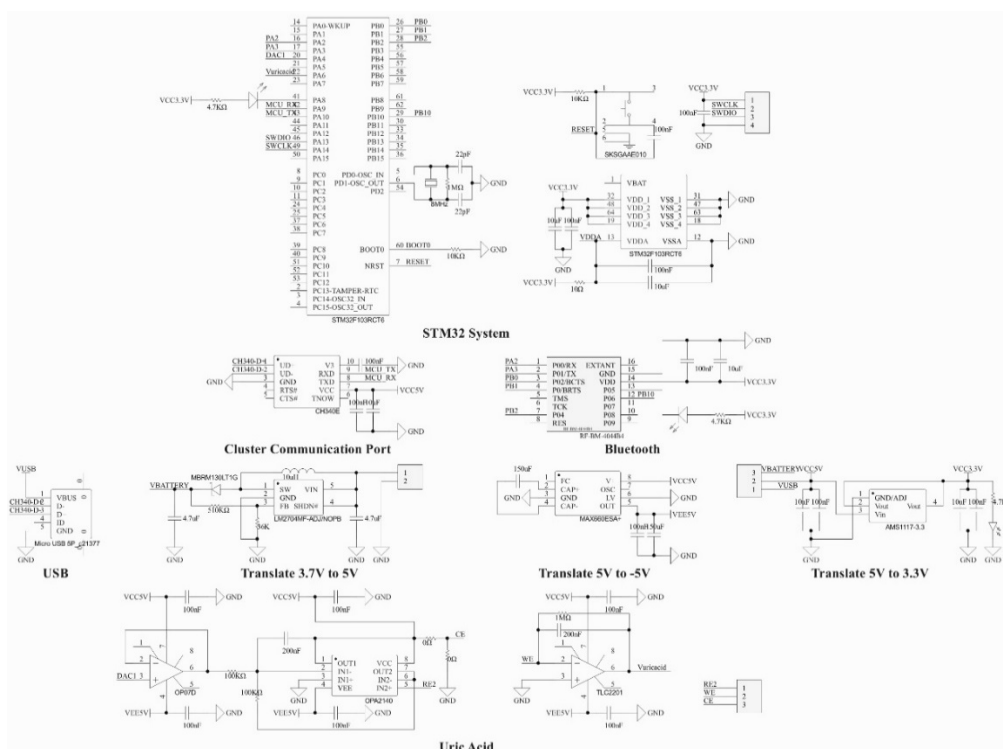

Figure S2. Schematic diagram of all circuits in the PSSS.

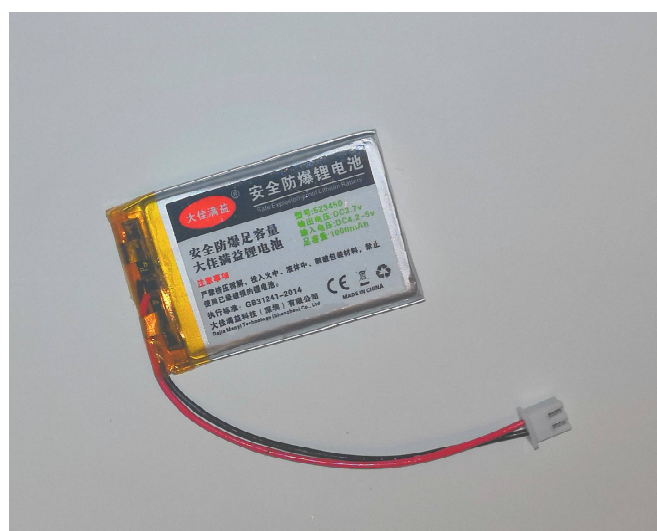

Figure S3. Detail photograph of the lithium battery (3.7V) employed for supplying power.

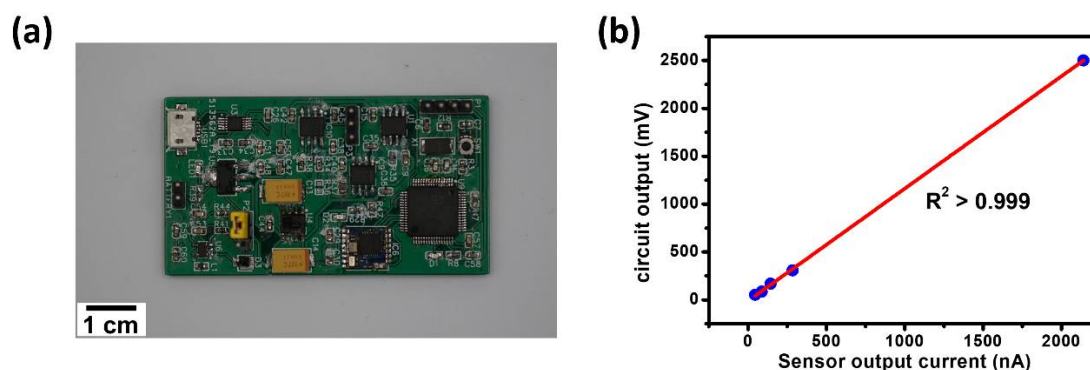

**Figure S4.** (a) Detail photograph of the PCB. (b) Input-output signal response for uric acid sensing signal channel of the PCB.

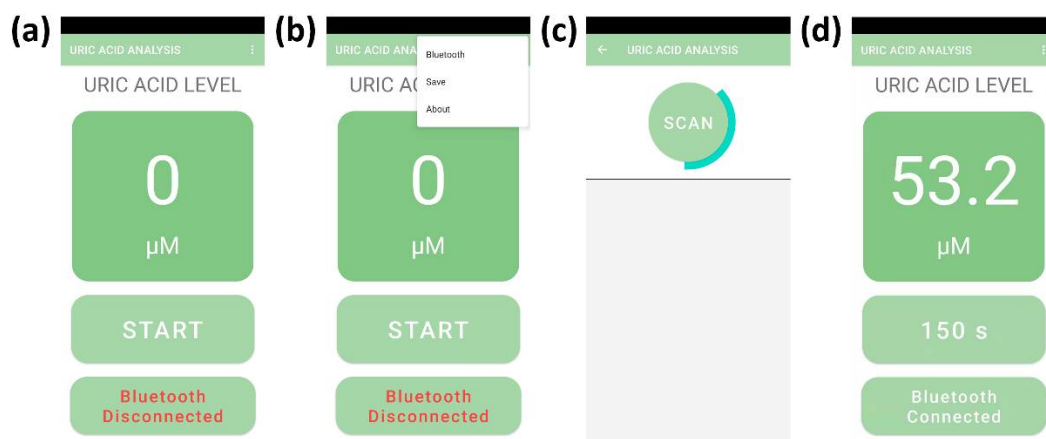

**Figure S5.** Display interface for the mobile application. (a) The main interface. (b) The menu of functions. (c) Bluetooth scanning and connecting. (d) The uric acid level was displayed 150s after the test started.
